## Natural odor ligands for olfactory receptor neurons of the female mosquito *Aedes aegypti*: use of gas chromatography-linked single sensillum recordings

Majid Ghaninia<sup>1,2,\*</sup>, Mattias Larsson<sup>1</sup>, Bill S. Hansson<sup>1,3</sup> and Rickard Ignell<sup>1</sup>

<sup>1</sup>SLU, Department of Plant Protection Biology, 230 53 Alnarp, Sweden, <sup>2</sup>Department of Plant Protection, College of Agriculture, Gorgan University of Agricultural Sciences and Natural Resources, Gorgan, Iran and <sup>3</sup>Max Plank Institute for Chemical Ecology, Department of Evolutionary Neuroethology, DE-07745 Jena, Germany

\*Author for correspondence (e-mail: majid.ghaninia@vv.slu.se)

Accepted 16 July 2008

### SUMMARY

Female *Aedes aegypti* are vectors of dengue and yellow fever. Odor volatiles are the predominant cues that drive the host-seeking behavior of *Ae. aegypti*. Odorant molecules are detected and discriminated by olfactory receptor neurons (ORNs) housed in sensory hairs, sensilla, located on the antennae and maxillary palps. In a previous study, we used odor volatiles that are behaviorally and/or electrophysiologically active for *Ae. aegypti* and other mosquito species to show that antennal ORNs of female *Ae. aegypti* are divided into functionally different classes. In the present study, we have, for the first time, conducted gas chromatography-coupled single sensillum recordings (GC–SSR) from antennal trichoid and intermediate sensilla of female *Ae. aegypti* in order to screen for additional putative host attractants and repellents. We used headspace collections from biologically relevant sources, such as different human body parts (including feet, trunk regions and armpit), as well as a plant species used as a mosquito repellent, *Nepeta faassenii*. We found that a number of ORN types strongly responded to one or more of the biological extracts. GC–SSR recordings revealed several active components, which were subsequently identified through GC-linked mass spectrometry (GC–MS). Electrophysiologically active volatiles from human skin included heptanal, octanal, nonanal and decanal.

Key words: *Aedes aegypti*, biologically active volatiles, electrophysiology, olfactory receptor neurons.

### INTRODUCTION

Besides being a nuisance, mosquitoes are vectors of diseases that affect both livestock and humans (Gubler, 1989; Monath, 1989). Diseases transmitted to humans by female *Aedes aegypti*, dengue and yellow fever, have emerged as a major public health problem (Gubler, 1989; Monath, 1989; Scott et al., 1993). The mechanisms by which these vectors locate their human hosts, nectar sources and oviposition sites are primarily olfactory driven (Takken and Knols, 1999). Electrophysiological analyses have shown that odor molecules are detected by olfactory receptor neurons (ORNs) that are mainly housed in antennal trichoid and grooved peg sensilla (Bentley and Day, 1989; Davis and Bowen, 1994; Davis and Rebert, 1972; McIver, 1982).

Attempts made to unravel the identity of compounds affecting mosquito behavior (Meijerink et al., 2000; Qiu et al., 2004; Qiu et al., 2006), have provided broad insight into human-emitted volatiles (Bernier et al., 2000; Bernier et al., 2002; Bernier et al., 2003; Curran et al., 2005). Through behavioral as well as electrophysiological studies, a handful of mosquito attractants have been identified from human emanates. We know, for example, that *L*-lactic acid, which is detected by specific ORNs housed in grooved peg sensilla of female *Ae. aegypti* (Davis and Sokolove, 1976), in synergy with carbon dioxide (CO<sub>2</sub>) elicit a significant attraction of mosquitoes towards their hosts (Bernier et al., 2003; Constantini et al., 1993; Dekker et al., 2002; Snow, 1970; Steib et al., 2001). Moreover, differential attractiveness of human hosts to mosquitoes has been attributed to the amount of lactic acid present in the host's skin (Dekker et al., 2002; Steib et al., 2001). Presence of CO<sub>2</sub> receptor neurons, which reside in maxillary palp sensilla, was first reported

by Kellogg (Kellogg, 1970). Carbon dioxide is exhaled from vertebrates and plays an important role in the location of hosts by mosquitoes, particularly for zoophilic species (De Jong and Knols, 1995; De Jong and Knols, 1996; Dekker et al., 2005; Snow, 1970). Attraction of females of *Ae. aegypti* and the African malaria mosquito, *Anopheles gambiae*, to incubated human sweat has been shown to be due mainly to the presence of ammonia, produced through microbial activity on the skin (Braks and Takken, 1999; Geier et al., 1999). This compound, which also has a synergistic effect on the behavioral response to *L*-lactic acid, is detected by grooved peg-associated ORNs (Geier et al., 1999; Meijerink et al., 2001). In addition, short- to medium-chain fatty acids and 1-octen-3-ol (octenol) emanating from human hosts have also been shown to elicit both electrophysiological and behavioral responses in female *Ae. aegypti* (Bosch et al., 2000; Bowen, 1992; Kline et al., 1990; Knols and Meijerink, 1997; Meijerink and van Loon, 1999). Moreover, there is ample evidence suggesting that additional compounds are exploited by mosquitoes to locate their hosts (Bosch et al., 2000; Geier et al., 1999; Qiu et al., 2006). Chemical analysis of human skin headspace collections has revealed at least 277 compounds (Bernier et al., 2000). Which of these compounds are detected by mosquito ORNs and what role these play in regulating behavioral attraction towards human hosts is, however, largely unknown.

Plants also constitute relevant odor sources for mosquitoes. Almost all mosquitoes require sugar resources, which are derived from flowers and extrafloral nectaries of their host plants (Takken and Knols, 1999). Orientation and attraction of mosquitoes to their host plant has been shown to be mediated by volatiles given off

from the plant (Takken and Knols, 1999). A few host plant-related compounds have been shown to be detected by ORNs of mosquitoes (Bowen, 1992; Davis, 1977). Some plant species are, however, repellent to mosquitoes (Curtis et al., 1991). Olfactory receptor neurons responsible for the detection of the active component(s) of these plants have not been reported.

In the present study, we have exploited the specificity and sensitivity of gas chromatography-linked single sensillum recordings (GC-SSRs) from female *Ae. aegypti* in order to identify novel biologically active volatile compounds. Apart from the previously characterized trichoid sensilla (Ghaninia et al., 2007) we performed GC-SSRs from intermediate sensilla in order to expand our knowledge concerning olfactory coding in this species. In order to identify compounds potentially used by *Ae. aegypti* for orientation towards their human host, we collected volatile samples from feet, trunk (chest and urogenital) regions, armpits and urine. We also collected volatiles from catnip, *Nepeta faassenii* (Lamiaceae). Species within the genus *Nepeta* contain volatile compounds that act as strong attraction inhibitors to mosquitoes (Amer and Mehlhorn, 2006a; Amer and Mehlhorn, 2006b).

## MATERIALS AND METHODS

### Mosquitoes

Four- to 8-day-old, non-bloodfed female *Aedes aegypti* L. mosquitoes of the Rockefeller strain were used in our experiments. Larvae were reared in plastic containers (20×18×7 cm) and were fed with Tetramin fish food. Pupae were put in a small plastic cup and were transferred to cylindrical buckets (20 cm diameter × 30 cm height) in which 200–300 adults were kept under 28°C, 75% relative humidity and at a 12 h:12 h L:D photoperiod. Adults had access to 10% sugar water presented on a filter paper.

### Headspace samples

Headspace samples were collected by placing odor sources in 3 l polyacetate oven bags, through which charcoal-purified air was circulated by means of an electric pump (KNF Neuberger, Stockholm, Sweden). Volatiles were trapped on filters with two compartments, containing 150 + 75 mg Porapak Q (Supelco) situated at the exhaust of the bag. Volatile collections lasted between 24 and 48 h. Extracts were prepared by rinsing filters with 800 µl of distilled hexane and concentrated to approximately one-third of the volume before use.

### Armpit odor sampling

The method that we used for armpit sampling has been provided by Curran et al. (Curran et al., 2005). Ten volunteers (eight males and two females, 29–39 years old) were given two double-layer sterile gauze pads (7×10 cm) to attach under their armpits for two consecutive days. The volunteers were also instructed to follow their daily life but not to use deodorant, perfumes and lotions and not to take a shower during this period. After 48 h, the pads were pooled and subjected to odor collection.

### Foot and trunk odor sampling

Fifteen male and five female volunteers aged 25–45 years were subject to foot odor sampling. All volunteers were given fresh socks to wear for 48 h as they do in their daily life. Some of the volunteers performed physical exercise. To collect volatiles from trunk regions three males and one female volunteer gave us their undergarments. Headspace collections and extractions of the volatiles from feet (through the pooled socks) and trunk regions (through the pooled undergarments) were performed as described above.

### Urine odor sampling

Urine from two male volunteers collected in a glass bowl was put into polyacetate food bag for headspace collection.

### Plant volatiles sampling

Whole, potted, *Nepeta faassenii* plants were placed inside the collection bags for plant odor collection.

### Mud volatiles sampling

Mud samples were collected from two small standing water lakes located in the vicinity of the institute, in a plastic tray (20×18×7 cm). The tray was then conveyed to the institute and placed in collection bags.

## Electrophysiology

### Mosquito preparation

A female mosquito was cooled by placing it in a –5°C freezer for ~1–2 min and then glued to a piece of double-sided sticky tape on a microscope slide (76×26 mm). The animal was secured by covering half of the thorax and the abdomen by tape. The antenna was lifted and placed on a small coverslip (18×18 mm) bearing a piece of double-sided sticky tape. The antenna of the mounted animal was viewed through an Olympus light microscope (BX51W1), which allowed for a highly magnified (750×) view of the sensilla on all antennal segments.

### Single-sensillum recordings (SSR) and gas chromatography (GC)-linked SSRs

Single sensillum recordings and GC-SSRs were performed according to standard protocols described by Stensmyr et al. (Stensmyr et al., 2003) and Ghaninia et al. (Ghaninia et al., 2007). Briefly, a sharpened tungsten microelectrode with a ~1 µm tip diameter was inserted into the eye. A second tungsten microelectrode was positioned at the base of a sensillum until electrical contact with the sensillum was established (Fig. 1). Action potentials of the ORNs housed in the sensillum were amplified through a USB-IDAC interface amplifier (Syntech, Kirchzarten, Germany), displayed on a computer screen and recorded for further investigations. SSRs were performed on previously characterized functional classes of trichoid sensilla (Ghaninia et al., 2007), as well as intermediate sensilla (Fig. 2). In order to identify the functional type of trichoid sensilla, we delivered a set of diagnostic compounds (see Ghaninia et al., 2007). After characterization, the activity of each biological extract was determined by stimulating the sensillum with 10 µl of each extract, pipetted on a piece of filter paper (5×20 mm) placed inside a Pasteur pipette. When an extract elicited responses from the ORNs, 2 µl of the extract was subsequently injected into a GC linked to the SSR recording setup via a heated transfer line (see below; Figs 1 and 3). Occasionally, contacts were lost before running the GC-SSR owing to inevitable environmental vibrations or animal muscle contractions, which may cause damage to the receptor neurons. Successful electrophysiological data were recorded and processed by means of Autospike 3 (Syntech). Spikes from neurons present in single sensilla were differentiated based on spike amplitude, where the larger amplitudes were denoted as A and the smaller amplitudes as B (Fig. 3A,B).

Injectations of the extracts were conducted on a HP 6890 gas chromatograph (Agilent Technologies, Palo Alto, CA, USA) fitted with a splitless injector (220°C) and flame ionization detector (FID) (220°C). Compounds were separated on a polar capillary column DB-WAX (30 m×0.25 mm inner diameter coated with chromatographic film with 0.25 µm film thickness). Carrier gas was

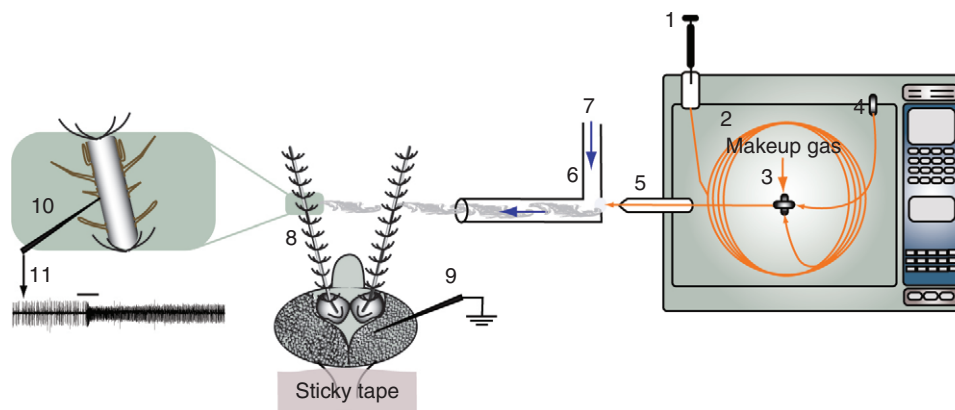

Fig. 1. (A) The gas chromatography-coupled single sensillum recording (GC-SSR) technique in mosquitoes. For GC, headspace extracts are injected using a microsyringe (1) onto a GC column (2). The column is situated in an oven. As the oven temperature increases, the components of the extract are separated, travel through the column and reach a split (3) from which half of the effluent goes to a flame ionization detector (FID) (4). The other half leaves the column and passes through a transfer line (5) to a glass tube (6) where a continuous humidified-purified airflow (7) blows the separated components of the extract over the mosquito antenna (8). For SSRs, two tungsten electrodes, a ground and a recording electrode (9 and 10), are placed into the eye and at the base of a single sensillum, respectively. Action potentials of the ORNs housed in a sensillum and their responses to the odor components are recorded (11).

hydrogen (speed  $37\text{ cm s}^{-1}$ ). The oven temperature was held at  $40^\circ\text{C}$  for 2 min and then increased at  $10^\circ\text{C min}^{-1}$  to a final temperature of  $230^\circ\text{C}$ , which was held for 10 min. The GC was fitted with a split at the end of the column, delivering half the effluent to the FID and the other half to the air stream flushing over the antenna via a heated transfer line ( $230^\circ\text{C}$ ).

#### Chemical identification

Identification of active compounds in the extracts was performed by means of coupled gas chromatography-mass spectrometry (GC-MS). Each extract ( $2\text{ }\mu\text{l}$ ) was injected into a 6890N gas chromatograph (Agilent Technologies) coupled to a 5975 mass spectrometer (Agilent Technologies). Compounds were separated on a polar capillary column DB-WAX ( $30\text{ m}\times 0.25\text{ mm}$  inner diameter coated with chromatographic film with  $0.25\text{ }\mu\text{m}$  film thickness). Carrier gas was helium (speed  $36\text{ cm s}^{-1}$ ). The oven temperature was held at  $40^\circ\text{C}$  for 2 min and then increased at  $10^\circ\text{C min}^{-1}$  to a final temperature of  $230^\circ\text{C}$ , which was held for 10 min.

The identity of active compounds was determined by comparison with references from mass spectral libraries (NIST05, Agilent Technologies). Final confirmation of identity was achieved by co-injection with synthetic reference compounds when these could be obtained.

#### Dose-response relationships

For verification of the physiological activity of chemicals identified through GC-MS, dose-response experiments were performed on the responding cells with synthetic reference chemicals when these could be obtained. The net response to a stimulus was quantified as the number of spikes  $0.5\text{ s}$  after stimulation minus  $0.5\text{ s}$  before stimulation. The outcome was then multiplied by two. Concentration of each synthetic compound ranged from  $0.001$  to  $10\%$  (v/v), dissolved in paraffin oil. Delivery of the compounds and analysis of the responses are described by Ghaninia et al. (Ghaninia et al., 2007).

#### Synthetic compounds

Compounds used for physiological characterization of sensilla were obtained from commercial suppliers (Ghaninia et al., 2007).

Synthetic references for confirmation of chemical identity and dose-response experiments in this study were obtained from SAFC (heptanal,  $+92\%$ ), Fluka (octanal,  $\geq 98\%$ ; nonanal,  $\geq 95\%$ ) and Sigma (decanal,  $99\%$ ).

## RESULTS

In the present study, we encountered nine of the 11 functional types of antennal trichoid sensilla previously identified by Ghaninia et al. (Ghaninia et al., 2007) (Table 1). A schematic drawing of all trichoid sensillum types together with the approximate distribution of their various functional types are shown in Fig. 2 (Ghaninia et al., 2007). Most neurons had spontaneous activity ranging from 20 to  $30\text{ Hz}$ . There appeared to be no consistent differences in spontaneous activity between sensillum types; we would rather attribute differences between individual sensilla to an effect of electrode penetration discussed by Meijerink et al. (Meijerink et al., 1999). Of the sensilla encountered in the present study, we managed to perform 25 successful GC-SSR runs on the nine previously defined trichoid sensillum types (Ghaninia et al., 2007) as well as on three novel types of intermediate sensilla, which we term i-1, i-2 and i-3 (Table 1).

Based on the number of FID peaks, all extracts contained roughly between 30 and 70 compounds (data not shown). Only four extract types (feet, trunk, armpit and *Nepeta*) elicited a response from antennal ORNs (Table 1), to a total of 12 FID peaks (components) (Table 2). Examples of chromatograms produced from different extract types, along with ORN responses corresponding to the peaks, are shown in Fig. 4. Overall, eight responding compounds, i.e. heptanal, octanal, nonanal, decanal, dodecanal, 2,6-dimethyl-2,6-octadien, geranylacetone (6,10-dimethyl-5,9-undecadien-2-one) and nepetalactone, were identified through GC-MS analyses (Table 2). Four of these compounds were verified by commercially available synthetic standards and their biological activity was confirmed by dose-response experiments (Fig. 5). The mass spectra of four physiologically active compounds could not be matched to any reference mass spectrum and are listed as 'unknown' (Table 2). Neither urine nor mud headspace extracts elicited a response in any of the ORN types tested (Table 1). These extracts contained the same complexity of peaks as seen in, for example, feet and trunk extracts (data not shown).

Overall, ORNs were narrowly tuned to one or a few components present in the extracts. Of the short sharp trichoid (sst) sensilla, only sst-4 responded to one of the extracts tested (trunk extract).

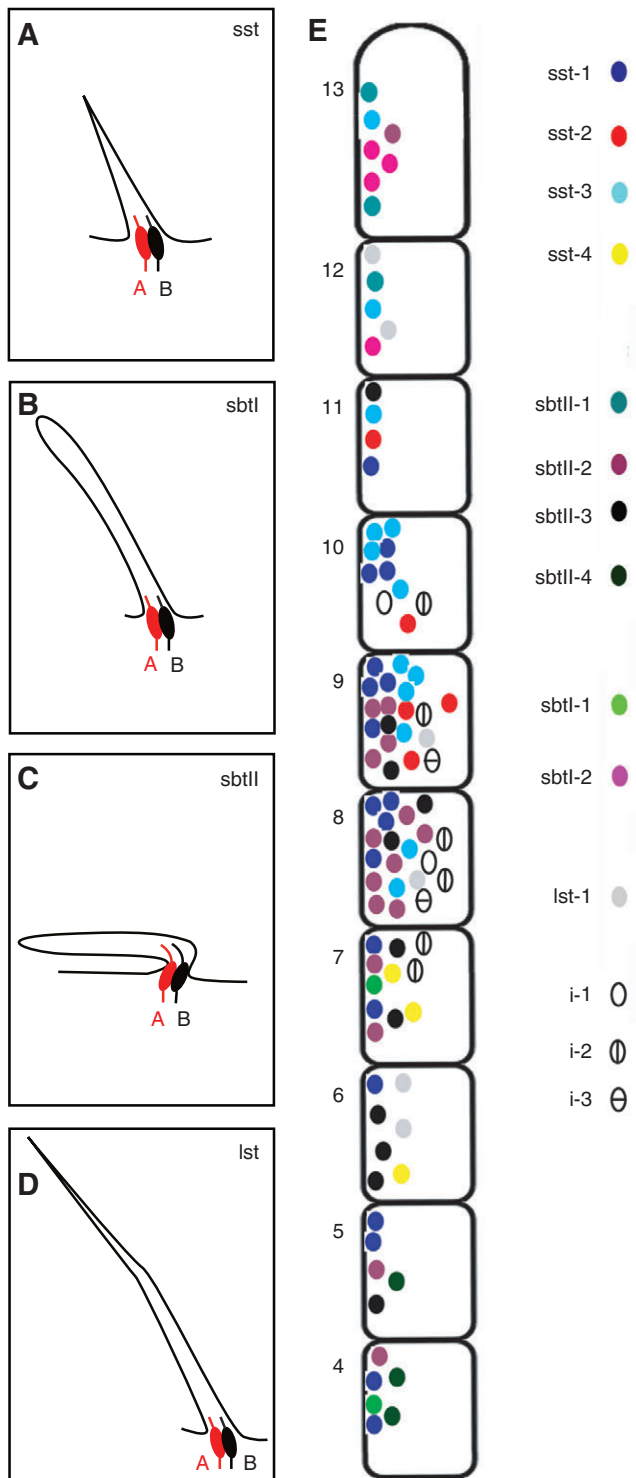

Fig. 2. (A-D) Schematic drawing of four morphologically distinct antennal trichoid sensilla of *Ae. aegypti* and (E) the approximate distribution, however, not the exact location, of their various functional types (Ghaninia et al., 2007) between the antennal segments. For the scanning electron micrograph of the sensilla, refer to Ghaninia et al. (Ghaninia et al., 2007). sst, short sharp-tipped; lst, long sharp-tipped; sbtl, short blunt-tipped I; sbtII, short blunt-tipped II; i, intermediate.

However, damage to this sensillum during the recording process did not allow us to run a GC-SSR experiment, and this type was not found again during the experiments (Table 1). The 'A' neuron of the short blunt trichoid sensillum type I (sbtII-1-A) responded only to the *Nepeta* extract, with the active compound identified as nepetalactone (Table 2). The sbtII-2-A cell detected the highest number of extract components (six in total): heptanal, octanal, nonanal, decanal, 2,6-dimethyl-2,6-octadien and geranylacetone (Table 2). None of the extracts elicited a response in long sharp (ls) trichoid sensilla (Table 1).

Based on GC-SSR analysis, we were able to define three novel functional classes of intermediate sensilla. These sensilla resemble the four distinct morphological types of the sensilla trichodea but vary in length (Davis and Rebert, 1972) (M.G., unpublished) and displayed unique responses to the tested extracts (Table 1). One of the intermediate sensillum types, i-1, responded to trunk volatiles, decanal and 'unknown 2' (Table 2). Five components, found in extracts of feet, trunk and *Nepeta*, activated the i-2A cell. We were able to identify two of these compounds as dodecanal and geranylacetone (Table 2). We observed a response of the i-2A neuron to the armpit extract but were unable to perform a GC-SSR run

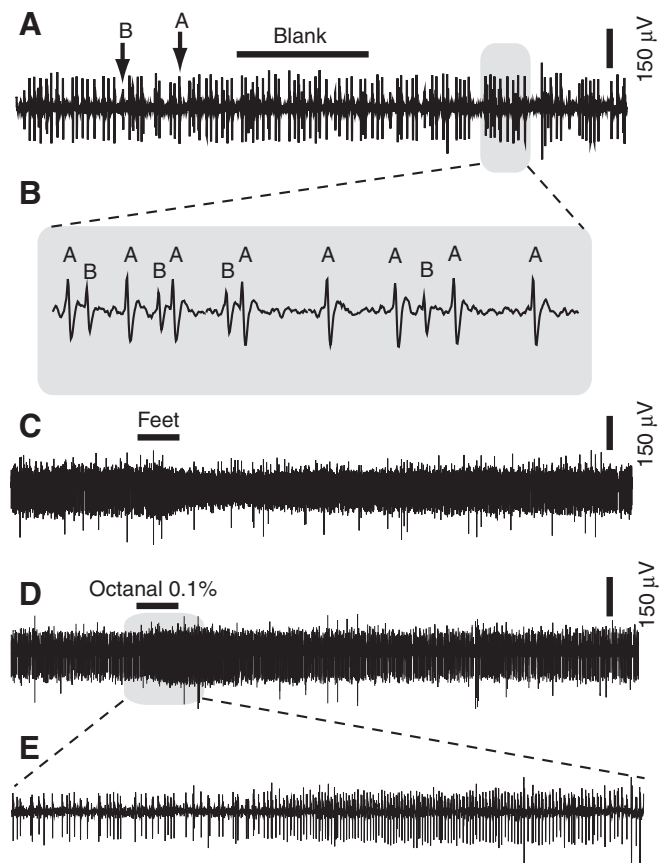

Fig. 3. Examples of recordings from receptor neurons showing spontaneous activity and responses of olfactory stimuli. (A) Spontaneous activity of two ORNs co-located in a short blunt type II trichoid sensillum, sbtII-2. (B) Inset showing 0.1 s of the spontaneous activity at higher resolution. Differences in spike amplitudes allow separation of two neurons, i.e. A (larger spikes) and B (smaller spikes). (C) Sensitivity of the neurons to the feet headspace extract was first tested by puffing it over the sensillum. (D) Stimulation of the sbtII-2A cell with 0.1% octanal, identified through GC-MS analyses of the feet headspace extract, elicited an excitatory response. (E) Expanded view of the response to octanal. Horizontal scale bars: 0.5 s odor stimulation. For the blank test we used paraffin oil only.



Table 1. Responses of the defined trichoid as well as intermediate sensilla to a set of extracts and their components determined by GC-SSRs

| Extract type | Short sharp |   |       |   |       |   |       |   | Short blunt I  |    |        |    | Short blunt II |    |                |    |         |   |         |    | Long sharp |   |     |                | Intermediate |                |     |                |   |   |
|--------------|-------------|---|-------|---|-------|---|-------|---|----------------|----|--------|----|----------------|----|----------------|----|---------|---|---------|----|------------|---|-----|----------------|--------------|----------------|-----|----------------|---|---|
|              | sst-1       |   | sst-2 |   | sst-3 |   | sst-4 |   | sbtI-1         |    | sbtI-2 |    | sbtII-1        |    | sbtII-2        |    | sbtII-3 |   | sbtII-4 |    | Ist-1      |   | i-1 |                | i-2          |                | i-3 |                |   |   |
|              | A           | B | A     | B | A     | B | A     | B | A              | B  | A      | B  | A              | B  | A              | B  | A       | B | A       | B  | A          | B | A   | B              | A            | B              | A   | B              |   |   |
| Feet         | 0           | 0 | 0     | 0 | 0     | 0 | 0     | 0 | 0              | 0  | 0      | 0  | NF             | NF | X <sup>2</sup> | 0  | 0       | 0 | 0       | NF | NF         | 0 | 0   | 0              | 0            | X <sup>4</sup> | 0   | 0              | 0 |   |
| Trunk        | 0           | 0 | 0     | 0 | 0     | 0 | +     | 0 | 0              | 0  | 0      | 0  | NF             | NF | X <sup>3</sup> | 0  | 0       | 0 | 0       | NF | NF         | 0 | 0   | X <sup>1</sup> | 0            | X <sup>3</sup> | 0   | X <sup>1</sup> | 0 |   |
| Armpit       | 0           | 0 | 0     | 0 | 0     | 0 | 0     | 0 | 0              | 0  | 0      | 0  | NF             | NF | X <sup>1</sup> | 0  | 0       | 0 | 0       | NF | NF         | 0 | 0   | 0              | 0            | +              | 0   | 0              | 0 |   |
| Urine        | 0           | 0 | 0     | 0 | 0     | 0 | 0     | 0 | NT             | NT | NT     | NT | NF             | NF | NT             | NT | 0       | 0 | 0       | NF | NF         | 0 | 0   | 0              | 0            | 0              | 0   | 0              | 0 |   |
| Mud          | 0           | 0 | 0     | 0 | 0     | 0 | 0     | 0 | 0              | 0  | 0      | 0  | NF             | NF | 0              | 0  | 0       | 0 | 0       | NF | NF         | 0 | 0   | 0              | 0            | 0              | 0   | 0              | 0 |   |
| Nepeta       | 0           | 0 | 0     | 0 | 0     | 0 | 0     | 0 | X <sup>1</sup> | 0  | 0      | 0  | NF             | NF | 0              | 0  | 0       | 0 | 0       | NF | NF         | 0 | 0   | 0              | 0            | X <sup>4</sup> | 0   | 0              | 0 | 0 |

sst, short sharp-tipped; Ist, long sharp-tipped; sbtI, short blunt-tipped I; sbtII, short blunt-tipped II; i, intermediate sensilla.  
0, no response; +, extract eliciting an electrophysiological response, N=1 each; X, response to at least one compound of the extract determined by GC-SSRs; NF, not found in the present study; these two sensilla types are very rare (Ghaninia et al., 2007); NT, not tested. 1, N=2; 2, N=9; 3, N=3; 4, N=1.

(Table 1). The A-neuron of the third intermediate sensillum type, i-3A, responded to a single compound in the trunk headspace extract (Table 1), later identified as geranylacetone (Table 2).

Dose-response experiments

In order to evaluate the sensitivity of the identified ORNs to the novel ligands, we obtained dose-response relationships for two of the functional classes of sensilla, sbtII-2 and i-1 (Fig. 5A,B). This was conducted by exposing the sensilla to different concentrations of the synthetic compounds (Table 2, Fig. 5C-L; see also Materials and Methods). The most potent stimulus, nonanal, elicited a significant response at 0.01% (Fig. 5A). The sensitivity threshold for nonanal was close to 0.001%, whereas the thresholds for octanal, heptanal and decanal were 10- or 100-fold higher. The responses to nonanal and octanal peaked at concentrations of 0.1% and 1%, respectively, and thereafter a reduction or no change in the response to higher concentrations was observed (Fig. 5A). The ‘A’ neuron of the intermediate sensillum, i-1A, exhibited a dose-dependent response to decanal with a response threshold of 0.1% (Fig. 5B).

DISCUSSION

In the present study, we have, for the first time, investigated the applicability of the GC-SSR technique to identify biologically relevant ligands for ORNs of female *Ae. aegypti*. One of the strengths of this technique is that it does not rely on *a priori* assumptions about components of odor blends when selecting candidates for subsequent electrophysiological or behavioral evaluations. The GC-SSR technique has a higher resolution and sensitivity compared with GC-coupled electroantennographic detection (GC-EAD), another method commonly used to screen for biologically active compounds (Logan et al., 2008; Qiu, 2005).

Through systematic GC-SSRs from physiologically characterized sensilla, we have been able to identify eight natural odor ligands from different headspace extracts that are detected by the ORNs of female *Ae. aegypti*. All the compounds identified in this study, except

Table 2. Physiologically active compounds identified from the different extract types

| Extract type | Sensillum type | Compound                               |
|--------------|----------------|----------------------------------------|
| Feet         | sbtII2         | Octanal*                               |
|              | sbtII2         | Nonanal*                               |
|              | i-2            | Unknown 1                              |
| Trunk        | sbtII2         | Octanal*                               |
|              | sbtII2         | Nonanal*                               |
|              | sbtII2         | 2,6-Dimethyl-2,6-octadien <sup>†</sup> |
|              | sbtII2         | Heptanal*                              |
|              | sbtII2         | Decanal*                               |
|              | sbtII2         | Geranylacetone <sup>†</sup>            |
|              | i-1            | Decanal*                               |
|              | i-1            | Unknown 2                              |
|              | i-2            | Dodecanal <sup>†</sup>                 |
| Armpit       | i-2            | Geranylacetone <sup>†</sup>            |
|              | i-3            | Geranylacetone <sup>†</sup>            |
|              | sbtII2         | Octanal*                               |
| Nepeta       | sbtII2         | Nonanal*                               |
|              | sbtI1          | Nepetalactone <sup>†</sup>             |
|              | i-2            | Unknown 3                              |
|              | i-2            | Unknown 4                              |

sbtI, short blunt-tipped I; sbtII, short blunt-tipped II; i, intermediate sensilla.  
\*Identified by means of comparison with synthetic standard (mass spectrum, co-injection).  
<sup>†</sup>Identified by means of comparison with mass spectral database.

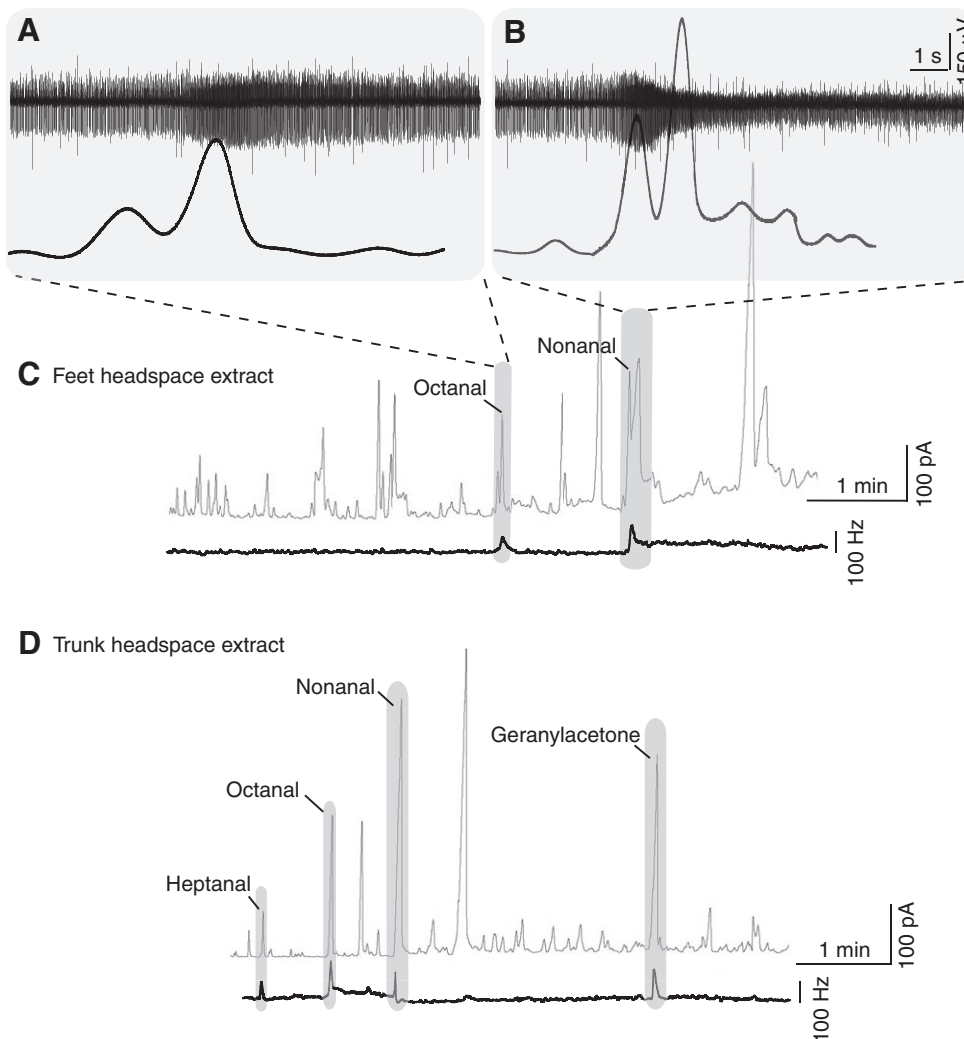

Fig. 4. Coupled GC-SSR from a short blunt type II trichoid (sbtII-2) sensillum, showing responses elicited by two different extracts: feet and trunk. Electrophysiological responses of the 'A' neuron (A,B) to octanal and nonanal, obtained from injection of the feet headspace extract. Responses of the same cell to four FID peaks (upper trace in C), obtained from injection of the trunk headspace extract. Mass spectrometry (MS) analyses identified FID peaks as heptanal, octanal, nonanal and geranylacetone. Some of the compounds are shared between different types of extracts. Lower traces in C and D represent continuous monitoring of spike frequency over time.

for 2,6-dimethyl-2,6-octadien, which, to our knowledge, represents a novel component of human skin, have previously been reported to be present in human skin emanations or in *Nepeta* species volatiles (Bernier et al., 2000; Bernier et al., 2002; Curran et al., 2005; McElvain et al., 1941). An interesting observation is that heptanal, octanal, nonanal and decanal, which are present in either fresh and/or incubated human sweat (Meijerink et al., 2000), are detected by ORNs of *Ae. aegypti* (present study) but were not found to elicit a response in female *An. gambiae* antennal ORNs using the EAG technique (Meijerink et al., 2000). This observation may be due to low resolution of the latter technique and/or it might be linked to the partial divergence of the *Ae. aegypti* and *An. gambiae* olfactory receptor repertoire (Bohbot et al., 2007). Future studies, including heterologous expression and behavioral studies will have to be designed to address this issue. Although some weak electrophysiological responses of the maxillary palp-associated ORNs to the above-mentioned aldehydes were reported in *An. gambiae* and *Culex quinquefasciatus* (Lu et al., 2007; Syed and Leal, 2007), until recently almost nothing was known about the behavioral importance of these compounds in mosquito life. Recently, GC-EAD studies of human-derived headspace have revealed some compounds identical to those found in the present study. The compounds included octanal, nonanal, decanal, dodecanal and geranylacetone, to which mosquitoes responded behaviorally (Logan et al., 2008).

The origin of human-specific volatiles emanating from different body regions has been attributed to the aggregation of diverse communities of microbiota (Braks et al., 1999). It has therefore been suggested that differences in microbiota on the human skin play an important role in generating individual body odors, driving the attraction of mosquitoes to different host individuals and even different body regions (Braks et al., 1999). Quantitative as well as qualitative differences of specific body odors have been suggested to underlie this differential attraction (Bernier et al., 2002; Penn et al., 2006). In the present study, GC-SSRs revealed that *Ae. aegypti* ORNs responded to octanal, nonanal and decanal. These compounds have previously been reported to be present in differing ratio patterns between individuals, indicating qualitative similarities among individuals with quantitative differences (Bernier et al., 2002; Curran et al., 2005). By contrast, 2,6-dimethyl-2,6 octadien and 6,10-dimethyl-5,9-undecadien-2-one were found at physiologically active levels exclusively in trunk headspace extracts, indicating a qualitative difference between body regions. The latter compound has previously been reported to be present in most but not all human individuals (Bernier et al., 2005). In conclusion, the peripheral olfactory system of female *Ae. aegypti* contains ORNs capable of detecting compounds that could be used to differentiate between individual hosts and even body regions. Behavioral studies have to be conducted to verify the role of these compounds in the complete volatile blend that mediates host attraction.

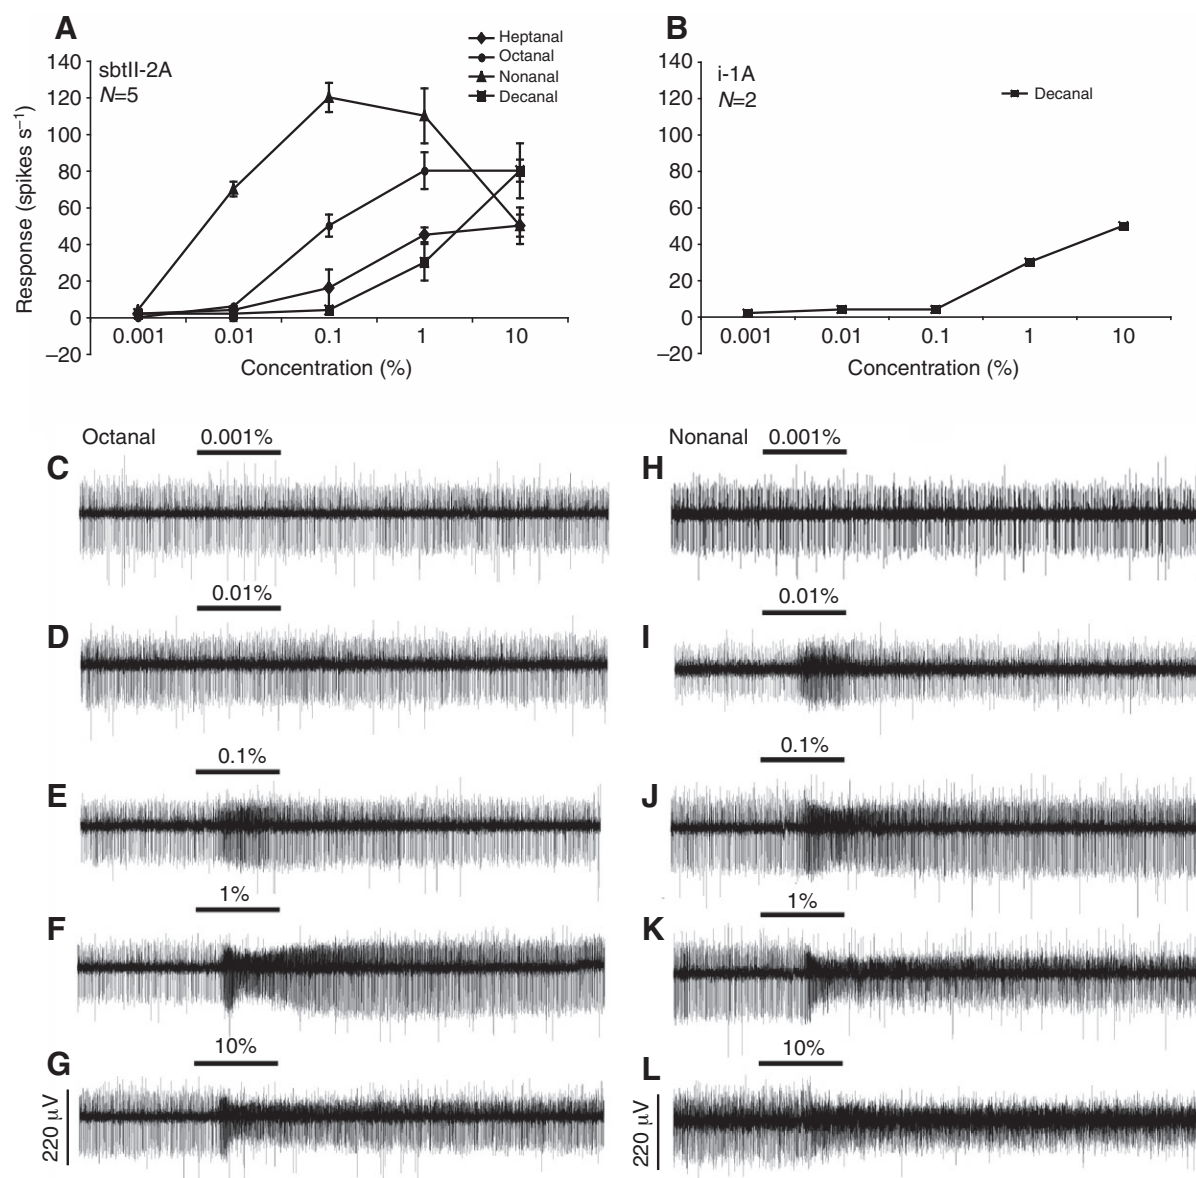

Fig. 5. Dose–response relationships for two physiological ORN types at five different odor concentrations. (A) Responses from sbtII-2A neurons to four different odor stimuli. (B) Responses of i-1A neurons to decanal. A and B show net responses to stimuli, after subtraction of the spontaneous activity. Examples of electrophysiological activity of a sbtII-2A neuron at five doses of octanal (C–G) and nonanal (H–L). Error bars show standard deviation.

In addition to responses to human volatiles, we observed responses to nepetalactone in sbtII sensilla. Nepetalactone is the primary component of catnip oil, the vapors of which have been shown to be repellent to a diverse number of insect species, including mosquitoes (Amer and Mehlhorn, 2006a; Eisner, 1964; Peterson and Coats, 2001; Peterson et al., 2002). In behavioral tests, nepetalactone acts as a ‘spatial repellent’, inhibiting the landing rate of *Ae. aegypti* and other mosquito species more than the commonly used synthetic mosquito repellent DEET (Bernier et al., 2005; Hui-Ling et al., 2006; Peterson and Coats, 2001).

Overall, very few ORNs associated with trichoid sensilla responded to the extracts tested. We assume that other sensillum types, i.e. grooved pegs as well as intermediate sensilla (as our study shows), might be involved in the detection of the current extract-associated components. Problems with odor collection/extraction

of some human related compounds have also been reported (Bernier et al., 2000; Cork and Park, 1996).

To this date, laboratory and field studies indicate that the use of CO<sub>2</sub> is one of the few environmentally safe procedures to suppress mosquito densities (Knols et al., 1994; Knols et al., 1998). Although CO<sub>2</sub> plays an important role in attracting mosquitoes in the field, this compound is non-specific. CO<sub>2</sub>-baited traps predominantly catch zoophilic mosquitoes whereas highly anthropophilic mosquitoes, which seem to require additional attractants, show limited attraction to the traps (Constantini et al., 1993; Knols et al., 1998; Mboera et al., 2000). Furthermore, application of CO<sub>2</sub> in the field is costly; it needs to be transported into the field in pressurized gas cylinders or as dry ice (Bernier et al., 2003; Curtis, 1996; Knols et al., 1994; Knols et al., 1998; Mboera et al., 2000). By contrast, the use of human-associated kairomones is considered as a good alternative method for collecting, monitoring or controlling host-seeking



mosquitoes, as these in a series of behavioral tests in the laboratory and field have shown to elicit high levels of attraction without the presence of CO<sub>2</sub> (Bernier et al., 2003; Edman, 1979; Eiras and Jepson, 1991; Eiras and Jepson, 1994; Gillies and Wilkes, 1974; Silva et al., 2005). The use of GC-SSRs and other analytical methods will be valuable for selecting additional kairomone compounds to optimize an attractive bait.

We are grateful to Göran Birgersson, Elisabeth Marling and Satoshi Okawa for technical assistance. We also thank anonymous volunteers of our experiments.

## REFERENCES

- Amer, A. and Mehlhorn, H. (2006a). Repellency effect of forty-one essential oils against *Aedes*, *Anopheles*, and *Culex* mosquitoes. *Parasitol. Res.* **99**, 478-490.
- Amer, A. and Mehlhorn, H. (2006b). The sensilla of *Aedes* and *Anopheles* mosquitoes and their importance in repellency. *Parasitol. Res.* **99**, 491-499.
- Bentley, M. D. and Day, J. F. (1989). Chemical ecology and behavioral aspects of mosquito oviposition. *Annu. Rev. Entomol.* **34**, 401-421.
- Bernier, U. R., Kline, D. L., Barnard, D. R., Schreck, C. E. and Yost, R. A. (2000). Analysis of human skin emanations by gas chromatography/mass spectrometry. 2. Identification of volatile compound that are candidate attractants for the yellow fever mosquito (*Aedes aegypti*). *Anal. Chem.* **72**, 747-756.
- Bernier, U. R., Kline, D. L., Schreck, C. E., Yost, R. A. and Barnard, D. R. (2002). Chemical analysis of human skin emanations: composition of volatiles from humans that differ in attraction of *Aedes aegypti* (Diptera: Culicidae). *J. Am. Mosq. Control Assoc.* **18**, 186-195.
- Bernier, U. R., Kilne, D. L., Posey, K. H., Booth, M. M., Yost, R. A. and Barnard, D. R. (2003). Synergistic attraction of *Aedes aegypti* (L.) to binary blends of L-lactic acid and acetone, dichloromethane, or dimethyl disulfide. *J. Med. Entomol.* **40**, 653-656.
- Bernier, U. R., Furman, K. D., Kline, D. L., Allan, S. A. and Barnard, D. R. (2005). Comparison of contact and spatial repellency of catnip oil and *N,N*-Diethyl-3-methylbenzamide (Deet) against mosquitoes. *J. Med. Entomol.* **42**, 306-311.
- Bohbot, J., Pitts, R. J., Kwon, H. W., Rutzler, M., Robertson, H. M. and Zwiebel, L. J. (2007). Molecular characterization of the *Aedes aegypti* odorant receptor gene family. *Insect Mol. Biol.* **16**, 525-537.
- Bosch, O., Geier, M. and Boeckh, J. (2000). Contribution of fatty acids to olfactory host finding of female *Aedes aegypti*. *Chem. Senses* **25**, 323-330.
- Bowen, M. F. (1992). Terpene-sensitive receptors in female *Culex pipiens* mosquitoes: electrophysiology and behavior. *J. Insect Physiol.* **38**, 759-764.
- Braks, M. A. H. and Takken, W. (1999). Incubated human sweat but not fresh sweat attracts the malaria mosquito *Anopheles gambiae sensu stricto*. *J. Chem. Ecol.* **25**, 663-672.
- Braks, M. A. H., Anderson, R. A. and Knols, B. G. J. (1999). Infochemicals in mosquito host selection: human skin microflora and *plasmodium* parasites. *Parasitol. Today* **15**, 409-413.
- Constantini, C., Gibson, G., Brady, J., Merzagora, L. and Coluzzi, M. (1993). A new odour-baited trap to collect host-seeking mosquitoes. *Parassitologia* **35**, 5-9.
- Cork, C. and Park, K. C. (1996). Identification of electrophysiologically-active compounds for the malaria mosquito, *Anopheles gambiae*, in human sweat extracts. *Med. Vet. Entomol.* **10**, 269-276.
- Curran, A. M., Scott, I. R., Prada, P. A. and Furton, K. G. (2005). Composition of the volatile organic compounds present in human odor using SPME-GC/MS. *J. Chem. Ecol.* **31**, 1607-1619.
- Curtis, C. F. (1996). Options for the control of malaria vectors. *Pestic. Outlook* **7**, 20-24.
- Curtis, C. F., Lines, L. D., Baolin, L. and Renze, A. (1991). Natural and synthetic repellents. In *Control of Disease Vectors in the Community* (ed. C. F. Curtis), pp. 75-92. London: Wolfe.
- Davis, E. E. (1977). Response of the antennal receptors of the male *Aedes aegypti* mosquito. *J. Insect Physiol.* **23**, 613-617.
- Davis, E. E. and Rebert, C. S. (1972). Elements of olfactory receptor coding in the yellow fever mosquito. *J. Econ. Entomol.* **65**, 1058-1061.
- Davis, E. E. and Sokolove, P. G. (1976). Lactic acid-sensitive receptors on the antennae of the mosquito, *Aedes aegypti*. *J. Comp. Physiol. A* **105**, 43-54.
- Davis, E. E. and Bowen, M. F. (1994). Sensory physiology for attraction in mosquitoes. *J. Am. Mosq. Control Assoc.* **10**, 316-325.
- De Jong, R. and Knols, B. G. J. (1995). Olfactory responses of host-seeking *Anopheles gambiae* s. s. (Diptera: Culicidae). *Acta Trop.* **59**, 333-335.
- De Jong, R. and Knols, B. G. J. (1996). Selection of biting sites by two malaria mosquito species. *Experientia* **51**, 80-84.
- Dekker, T., Steib, B., Cardé, R. and Geier, M. (2002). L-Lactic acid: a human-signifying host cue for the anthropophilic mosquito *Anopheles gambiae*. *Med. Vet. Entomol.* **16**, 91-98.
- Dekker, T., Geier, M. and Cardé, R. (2005). Carbon dioxide instantly sensitizes female yellow fever mosquitoes to human skin odours. *J. Exp. Biol.* **208**, 2963-2972.
- Edman, J. D. (1979). Orientation of some Florida mosquitoes (Diptera: Culicidae) towards small vertebrates and carbon dioxide in the field. *J. Med. Entomol.* **15**, 292-296.
- Eiras, A. E. and Jepson, P. C. (1991). Host location by *Aedes aegypti* (Diptera: Culicidae): a wind tunnel study of chemical cues. *Bull. Entomol. Res.* **81**, 151-160.
- Eiras, A. E. and Jepson, P. C. (1994). Responses of females *Aedes aegypti* (Diptera: Culicidae) to host odorous and convection currents using an olfactometer bioassay. *Bull. Entomol. Res.* **84**, 207-211.
- Eisner, T. (1964). Catnip: its raison d'être. *Science* **146**, 1318-1320.
- Geier, M., Bosch, O. and Boeckh, J. (1999). Ammonia as an active component of host odour for the yellow fever mosquito, *Aedes aegypti*. *Chem. Senses* **24**, 647-653.
- Ghaninia, M., Ignell, R. and Hansson, B. S. (2007). Functional classification and central nervous projections of olfactory receptor neurons housed in antennal trichoid sensilla of female yellow fever mosquitoes, *Aedes aegypti*. *Eur. J. Neurosci.* **26**, 1611-1623.
- Gillies, M. T. and Wilkes, T. J. (1974). The range of attraction of animal baits and carbon dioxide for mosquitoes (Diptera: Culicidae). *Bull. Entomol. Res.* **63**, 573-581.
- Gubler, D. J. (1989). Dengue. In *The Arboviruses: Epidemiology and Ecology* (ed. T. P. Monath), pp. 223-260. FL: CRC Press.
- Hui-Ling, H., Xiao-Jun, D. and Jia-Wei, D. (2006). Extraction of catnip essential oil components and their repellent activity against *Aedes albopictus* and *Culex pipien pallens*. *Acta Entomol. Sin.* **49**, 533-537.
- Kellogg, F. E. (1970). Water vapour and carbon dioxide receptors in *Aedes aegypti*. *J. Insect Physiol.* **16**, 99-108.
- Kline, D. L., Takken, W., Wood, J. R. and Carlson, D. A. (1990). Field studies on the potential of butanone, carbon dioxide, honey extract, 1-octen-3-ol, L-lactic acid and phenols as attractants for mosquitoes. *Med. Vet. Entomol.* **4**, 383-391.
- Knols, B. G. J. and Meijerink, J. (1997). Odors influence mosquito behavior. *Sci. Med.* **4**, 56-63.
- Knols, B. G. J., De Jong, R. and Takken, W. (1994). Trapping system for testing olfactory responses of the malaria mosquito *Anopheles gambiae* in a windtunnel. *Med. Vet. Entomol.* **8**, 386-388.
- Knols, B. G. J., Mboera, L. e. G. and Takken, W. (1998). Electric nets for studying odour-mediated host-seeking behaviour of mosquitoes. *Med. Vet. Entomol.* **12**, 116-120.
- Lagon, J. G., Birkett, M. A., Clark, S. J., Power, S., Seal, N. J., Wadham, L. J., Mordue, A. J. and Pickett, J. A. (2008). Identification of human-derived volatile chemicals that interfere with attraction of *Aedes aegypti* mosquitoes. *J. Chem. Ecol.* **34**, 308-322.
- Lu, T., Qiu, Y. T., Wang, G., Kwon, J. Y., Rutzler, M., Kwon, H. W., Pitts, R. J., van Loon, J. J., Takken, W., Carlson, J. R. et al. (2007). Odor coding in the maxillary palp of the malaria vector mosquito *Anopheles gambiae*. *Curr. Biol.* **17**, 1533-1544.
- Mboera, L. E. G., Knols, B. G. J., Braks, M. A. H. and Takken, W. (2000). Comparison of carbon dioxide-baited trapping systems for sampling outdoor mosquito populations in Tanzania. *Med. Vet. Entomol.* **14**, 257-263.
- McIver, S. B. (1982). Sensilla of mosquitoes (Diptera: Culicidae). *J. Med. Entomol.* **19**, 489-535.
- Meijerink, J. and van Loon, J. J. A. (1999). Sensitivities of antennal olfactory neurons of the malaria mosquito, *Anopheles gambiae*, to carboxylic acid. *J. Insect Physiol.* **45**, 365-373.
- Meijerink, J., Braks, M. A. H., Brack, A., Adam, A., Dekker, T., Posthumus, M. A., Van Beek, T. A. and Van Loon, J. J. A. (2000). Identification of olfactory stimulants for *Anopheles gambiae* from human sweat samples. *J. Chem. Ecol.* **26**, 1367-1382.
- Meijerink, J., Braks, M. A. H. and van Loon, J. J. A. (2001). Olfactory receptors on the antennae of the malaria mosquito *Anopheles gambiae* are sensitive to ammonia and other sweat-borne components. *J. Insect Physiol.* **47**, 455-464.
- McElvain, S. M., Bright, R. D. and Johnson, P. R. (1941). The constituents of the volatile oil of catnip. I. Nepetalic acid, nepetalactone, and related compounds. *J. Am. Chem. Soc.* **63**, 1558-1563.
- Monath, T. P. (1989). Yellow fever. In *The Arboviruses: Epidemiology and Ecology* (ed. T. P. Monath), pp. 139-231. FL: CRC Press.
- Penn, D. J., Oberzaucher, E., Grammer, K., Fischer, G., Soini, H. A., Wiesler, D., Novonty, M. V., Dixon, S., Xu, Y. and Breerton, R. G. (2006). Individual and gender fingerprints in human body odour. *J. R. Soc. Interface* **4**, 331-340.
- Peterson, C. J. and Coats, (2001). Insect repellents: past, present and future. *Pestic. Outlook* **12**, 154-158.
- Peterson, C. J., Nemetz, L. T., Jones, L. M. and Coats, J. R. (2002). Behavioral activity of catnip (Lamiaceae) essential oil components to the German cockroach (Blattodea: Blattellidae). *J. Econ. Entomol.* **95**, 377-380.
- Qiu, Y. T. (2005). Sensory and behavioural responses of the malaria mosquito *Anopheles gambiae* to human odours. Ph.D. thesis, Wageningen University, The Netherlands.
- Qiu, Y. T., Smallegange, R. C., Hoppe, S., van Loon, J. J. A., Bakker, E. J. and Takken, W. (2004). Behavioural and electrophysiological responses of the malaria mosquito *Anopheles gambiae* Giles *sensu stricto* (Diptera: Culicidae) to human skin emanations. *Med. Vet. Entomol.* **18**, 429-438.
- Qiu, Y. T., Smallegange, R. C., van Loon, J. J. A., Ter Braak, C. J. F. and Takken, W. (2006). Interindividual variation in the attractiveness of human odours to the malaria mosquito *Anopheles gambiae* s. s. *Med. Vet. Entomol.* **20**, 280-287.
- Scott, T. W., Chow, E., Strickman, D., Kittayapong, P., Wirtz, R. A., Lorenz, L. H. and Edman, J. D. (1993). Blood-feeding patterns of *Aedes aegypti* (Diptera: Culicidae) collected in a rural Thai village. *J. Med. Entomol.* **30**, 922-927.
- Silva, I. M., Eiras, A. E., Kline, D. L. and Bernier, U. R. (2005). Laboratory evaluation of mosquito traps baited with a synthetic human odor blend to capture *Aedes aegypti*. *J. Am. Mosq. Control Assoc.* **21**, 229-233.
- Snow, W. F. (1970). The effect of a reduction in expired carbon dioxide on the attractiveness of human subjects to mosquitoes. *Bull. Entomol. Res.* **60**, 43-48.
- Steib, B. M., Geier, M. and Boeckh, J. (2001). The effect of lactic acid on odour-related host preference of yellow fever mosquitoes. *Chem. Senses* **26**, 523-528.
- Stensmyr, M. C., Dekker, T. and Hansson, B. S. (2003). Evolution of the olfactory code in the *Drosophila melanogaster* subgroup. *Proc. R. Soc. Lond. B, Biol. Sci.* **270**, 2333-2340.
- Syed, Z. and Leal, W. S. (2007). Maxillary palps are broad spectrum odorant detectors in *Culex quinquefasciatus*. *Chem. Senses* **32**, 728-738.
- Takken, W. and Knols, B. G. J. (1999). Odor-mediated behavior of afrotropical malaria mosquitoes. *Annu. Rev. Entomol.* **44**, 131-151.
